# Supplementary material for: Antigen-driven selection of antibodies against SSA, SSB and the centromere ‘complex’, including a novel antigen, MIS12 complex, in human salivary glands
Source: PubMed Central journal article supplement — Ann Rheum Dis. 2019 Oct 14;79(1):150–8. doi: 10.1136/annrheumdis-2019-215862 (PMC6937410; doi:10.1136/annrheumdis-2019-215862), 2019-10-14
Supplement: annrheumdis-2019-215862supp001.pdf [file annrheumdis-2019-215862supp001.pdf]

**Supplementary Information**

Supplementary file 1

Supplementary methods

Supplementary tables

Supplementary table S1. Primers

Supplementary table S2. Lesion antibody panel list

Supplementary table S3. Clinical characteristics of the patients used for the lesion antibody panel

Supplementary table S4. Anti-SSA/SSB profile of serum and lesion antibody panel

Supplementary table S5. ACA profile of serum and lesion antibody panel

Supplementary figures

Supplementary figure S1. Cloning strategy of immunoglobulin sequences from a single-cell cDNA library

Supplementary figure S2. Identification of ACA-secreting cells in the salivary glands

Supplementary data

Supplementary data S1. Mass spectrometry results

**Supplementary file 1**

## Supplementary methods

## Clinical samples

Labial salivary glands were collected from patients who were suspected of having SS and underwent biopsy for diagnosis. Serum samples were collected from patients who were suspected of having SS, or who were diagnosed as SSc or PBC at Keio University Hospital. The classification of SS, SSc, and PBC was conducted according to the classification criteria for primary SS established in 2016<sup>4</sup>, classification criteria for SSc established in 2013<sup>8</sup>, and criteria established in 2017<sup>37</sup>, respectively. The following parameters were collected from medical charts: anti-nuclear antibody (ANA) titer and type; serum positivity for anti-SSA, anti-SSB, anti-CENP-B antibody (determined by ELISA, MBL, Nagoya, Japan), and rheumatoid factor (RF, measured by a latex agglutination test); Greenspan grade of the local lymphocytic sialadenitis of a labial salivary gland biopsy; and medication history. This study was approved by the Institutional Review Board of our University School of Medicine and conducted in compliance with the tenets of the Declaration of Helsinki. Written informed consent was obtained from all participating individuals.

## Preparation of single-cell cDNA library of ASCs from the labial salivary glands

A single-cell suspension was prepared according to previously published methods<sup>24</sup> with minor modifications. In brief, labial salivary gland tissue was mechanically and enzymatically digested in Dulbecco's modified Eagle's medium (DMEM) containing 1 mg/ml collagenase type 2 (Worthington, NJ, USA) at 37 °C in 5% CO<sub>2</sub> for 30 min. After filtering through a 40 µm cell strainer, the cells were stained with fluorochrome-conjugated antibody against CD3, CD4, CD8, CD19, CD38, and CD326 and with 7-aminoactinomycin D (7AAD). The live ASCs (7AAD<sup>-</sup>CD3<sup>+</sup>CD4<sup>+</sup>CD8<sup>-</sup>CD326<sup>-</sup>CD19<sup>+</sup>CD38<sup>high</sup>) were bulk sorted using a FACS Aria III flow cytometer (BD Biosciences), and then single-cell cDNA libraries were created using a C1 system (Fluidigm, CA, USA) or Smart-seq2. For the C1 system, the cells were processed in Single-cell Auto Prep Array IFC (5-10 µm) according to the manufacturer's instructions. Smart-seq2 was performed as previously described<sup>32</sup>.

## Production of an antibody expression vector

IgH, Igλ and Igκ gene transcripts were amplified by PCR according to previously published methods<sup>20</sup> with some modifications. The overall strategy is shown in online supplementary figure S1. Single-cell cDNA libraries amplified by C1 at a 1:10 dilution or by Smart-seq2 without dilution were used as templates. First, PCR was performed with a total volume of 20 µl containing 1 µl of cDNA library, 300 nM of each primer, and 10 µl of KAPA HiFi HS ReadyMix (KAPA Biosystems, MA, USA). The cycling parameters were as follows: 95 °C for 3 min; 30 cycles at 98 °C for 20 s, 65 °C for 15 s, and 72 °C for 30 s; and 72 °C for 1 min. To clone the IgH chain, PCR products were electrophoresed on a 0.8% agarose gel, and targeted bands were extracted from the gel using the Nucleospin Gel and PCR clean-up Kit (Takara Bio, Shiga, Japan) and sequenced (Eurofins, Tokyo, Japan). SHM status and gene usage were analyzed by IMGT/V-

QUEST ([http://www.imgt.org/IMGT\\_vquest/vquest](http://www.imgt.org/IMGT_vquest/vquest)). A second PCR was performed using a forward primer mixture and reverse primer that was created based on its junction sequence in a total volume of 20  $\mu$ l containing 1  $\mu$ l of 1<sup>st</sup> PCR product, 300 nM of each primer, and 10  $\mu$ l of KAPA HiFi HS ReadyMix. The cycling parameters were as follows: 95 °C for 3 min; 15 cycles at 98 °C for 20 s, 65 °C for 15 s, and 72 °C for 30 s; and 72 °C for 1 min. When the 2<sup>nd</sup> PCR failed to generate the appropriate band of the IgH-V region, the forward primer was individually designed for each cell based on the sequence information. To clone an Ig $\lambda$  or Ig $\kappa$  chain, the 2<sup>nd</sup> PCR was performed using a forward primer mixture and a reverse primer mixture (for Ig $\lambda$ ) or a reverse primer (for Ig $\kappa$ ) in a total volume of 20  $\mu$ l containing 1  $\mu$ l of cDNA, 300 nM each primer, and 10  $\mu$ l of KAPA HiFi HS ReadyMix. The products of the second PCR were electrophoresed, purified and inserted into the expression vector for IgH or IgL using NEBuilder HiFi DNA Assembly Master Mix (New England Biolabs, MA, USA) according to the manufacturer's instructions. The expression vectors were transformed into DH5 $\alpha$  cells (TOYOBO, Osaka, Japan) and isolated using the PureYield Plasmid Miniprep System (Promega, WI, USA). The expression vectors were sequenced to confirm identity with the original PCR products. List of the primer used are shown in online supplementary table S1. List of the lesion antibody panel is shown in online supplementary table S2.

#### Antibody production and purification

Antibody were produced by transient cotransfection of IgH and IgL vectors using the Expi293 Expression System (Thermo Fisher Scientific, MA, USA) according to the manufacturer's instructions. Supernatants were collected after 7 days of culture, and antibody were purified using Ab Capcher Mag (Protenova, Kagawa, Japan). Purities and concentrations of recombinant antibody were determined by SDS-PAGE and CBB staining using a 12.5% Supersep precast gel and Quick CBB Plus (FUJIFILM Wako, Osaka, Japan); recombinant human IgG1 was used as a quantitative control.

#### ELISAs

The polyreactivity of each antibody was tested by polyreactivity ELISA as previously described<sup>22</sup> with minor modifications. Briefly, lipopolysaccharides (LPS, Sigma-Aldrich, MO, USA, 10  $\mu$ g/ml), insulin (Thermo Fisher Scientific, 5  $\mu$ g/ml), or dsDNA (plasmid, 10  $\mu$ g/ml) was coated on a microtiter plate overnight at room temperature (RT). The plates were washed three times with phosphate-buffered saline (PBS) with 0.05% Tween-20 (PBS-T) and blocked with ELISA Blocking Buffer (Bethyl Laboratories, TX, USA) for 2 hours. After washing, the plates were reacted with antibody diluted in ELISA Blocking Buffer with 0.05% Tween-20 for 2 hours. After washing, the plates were reacted with an HRP-conjugated anti-human IgG antibody (0.66  $\mu$ g/ml, Jackson ImmunoResearch, PA, USA) for 1 hour, washed, and reacted with the TMB Substrate Set (BioLegend, CA, USA) for 10 min. Reactions were stopped with H<sub>2</sub>SO<sub>4</sub>, and the optical density at 450 nm (OD 450) was measured. We considered antibody binding to two or more of the three antigens to be polyreactive.

mAb reactivity with SSA52, SSA60, and SSB was tested using anti-SSA52, anti-SSA60, and anti-SSB ELISAs (ORGENTEC, Mainz, Germany). mAb reactivity with CENP-B was tested using an anti-

CENP-B ELISA (ORGENTEC) and MESACUP-2 test CENP-B (MBL). These ELISAs were performed at a concentration of 2 µg/ml for each mAb, and cutoffs were determined as 80% quantile + 3 × (80% quantile - 20% quantile).

#### Western blot analysis

Fragmented SSB cDNAs (1-107 AA, 108-242 AA, and 243-408 AA) were cloned into the pcDNA3.4 vector (Thermo Fisher Scientific) combined with green fluorescent protein (GFP) and a linker (GGGGS) at the N-terminus. These vectors were transfected into 293T cells using polyethyleneimine (Polysciences, PA, USA). Two days after transfection, the cells were lysed in Tris-buffered saline containing 1% Triton X-100 (TBSTx) with a protease inhibitor cocktail (FUJIFILM Wako). Cell lysates were cleared by centrifugation at 16,000 g for 15 min at 4 °C, and the supernatant was aliquoted and frozen at -80 °C until used.

The cell lysates were electrophoresed by SDS-PAGE using a 12.5% gel and transferred onto polyvinylidene difluoride (PVDF) membranes. The membranes were blocked with PVDF Blocking Reagent for Can Get Signal (TOYOBO) for 1 hour, followed by incubation with an anti-GFP antibody or SSB-reactive mAbs. After washing, the membranes were incubated with an HRP-conjugated anti-mouse IgG or anti-human IgG antibody for 1 hour. After extensive washing, SSB fragment-binding antibody were visualized using ImmunoStar LD (FUJIFILM Wako).

#### Antigen-binding beads assay

The antigens, MIS12, PMF1, DSN1, NSL1, CBX5, CENP-A, CENP-B, and CENP-C were cloned into the pEF vector<sup>38</sup> (kindly gifted by Dr. A. Yamashita) combined with the SBP tag and GFP at the N-terminus of the antigens. Point mutant (D355A) of SSA52 was generated by PrimeSTAR Mutagenesis Basal Kit (Takara Bio). SSA52, SSA52-D355A, and SSB were cloned into the pcDNA3.4 vector (Thermo Fisher Scientific) combined with the SBP tag and GFP at the N-terminus of the antigens. The lysates of antigen-expressing 293T cells were prepared as previously described. SSA60, which is known to be an extremely difficult recombinant protein to produce, was purchased from Diarect<sup>39</sup>, a proven manufacturer.

To create antigen-binding beads, Dynabeads M-280 Streptavidin (Thermo Fisher Scientific) was washed once with TBSTx, added to the cell lysate, and incubated for 30 min at 4 °C with shaking at 1,400 rpm. The beads were washed extensively 3 times using TBSTx with 1 M NaCl for 1 min, once using TBSTx with 0.5 M NaCl for 10 min at 4 °C with shaking at 1,400 rpm, and once with PBS.

The antigen-binding beads were used for determining the specificity and affinity of mAbs or measuring serum antibody titers by flow cytometry. Briefly, the beads were incubated with a mAb at the indicated concentration in staining buffer (PBS with 2 mM EDTA and 0.5% BSA) or serum at a 1:300 dilution in staining buffer with 0.1% Tween-20 for 20 min at 4 °C. After washing once (for a mAb) or twice (for serum) with staining buffer, the beads were stained with anti-human IgGfC antibody and anti-human IgAfC antibody. After washing once, the beads were analyzed by a FACSVerse and FlowJo software (BD Biosciences, CA, USA).

### Immunoprecipitation (IP)

Lysates of K562 cells were prepared by same procedure as 293T cells. For immunoprecipitation, 1 µg of mAb was incubated with K562 cell lysate (equivalent to  $2.5 \times 10^6$  cells) or TBSTx at 4 °C overnight. Then, 5 µl of Dynabeads protein G (Thermo Fisher Scientific) was added and incubated for 30 min with shaking. After extensive washing, the proteins bound to the beads were eluted by boiling in 1x Laemmli Sample Buffer (Bio-Rad, CA, USA), electrophoresed, and visualized by silver staining (Aproscience, Tokushima, Japan). The visualized bands were excised, and the proteins were identified by mass spectrometry. The immunoprecipitation results were confirmed by western blot analysis using antibody against DSN1, MIS12, the MIS12C, and human IgG.

### Mass spectrometry

Immunoprecipitated products were analyzed using a liquid chromatography-tandem mass spectrometer (LC-MS/MS, LTQ Orbitrap, Thermo Fisher Scientific) after tryptic digestion. All MS/MS spectra data were analyzed using Mascot software (Matrix Science, London, UK).

### ANA test

ANA test was performed at a concentration of 50 µg/ml for each antibody using the Fluoro HEp-2 ANA test (MBL) according to the manufacturer's instructions. Slides were analyzed using an LSM710 and ZEN 2.3 SP1 software (ZEISS, Oberkochen, Germany).

### Detection of autoantibody-producing cells in the salivary glands

Lysates of SBP-GFP-antigen-expressing 293T cells were prepared as previously described. To purify the SBP-GFP-antigens, Streptavidin Sepharose High Performance (GE Healthcare Japan, Tokyo, Japan) was washed once with TBSTx, added to the antigen-expressing supernatant, and incubated for 2 hours at 4 °C with shaking. The beads were washed extensively as previously described, and then the SBP-GFP-antigens were eluted by incubating with 1x Buffer BXT (IBA, Göttingen, Germany) for 30 min at 4 °C at 1,400 rpm. The purities of the SBP-GFP-antigens were checked by CBB staining, and their concentrations were measured by a BCA protein assay (Thermo Fisher Scientific).

Immunohistochemical staining was performed according to previously published methods<sup>15</sup> with modifications. In brief, 4-µm sections of LSG were cut with a cryostat, fixed in acetone for 10 min, blocked with 5% BSA and 10% goat serum in PBS for 10 min at RT, and incubated with SBP-GFP-antigen and antibody against CD4, CD8, CD20, and CD138, each at a concentration of 5 µg/ml for 60 min at RT. After washing, the slides were incubated with an Alexa Fluor 594-conjugated anti-mouse or rat IgG antibody (1:500 dilution) for 30 min at RT. After washing, the slides were mounted with VECTASHIELD Mounting Medium with DAPI (Vector Laboratories, CA, USA). Autoantibody-producing cells were semiquantified using an LSM710 and ZEN 2.3 SP1 software.

### Antibody

The following antibody were used: recombinant human IgG1 (QA16A12), anti-CD3 (APC/Cy7, UCHT1), anti-CD4 (PE/Cy7, SK3), anti-CD8 (BV510, RPA-T8), anti-CD19 (BV421, HIB19), anti-CD38 (FITC, HIT2), anti-CD138 (APC, MI15), and anti-CD326 (PE, 9C4) from BioLegend; anti-human IgG (HRP), anti-human IgG-Fc (APC or HRP, goat-F(ab')<sub>2</sub> fragment), and anti-human IgA-Fc (BV421, goat-F(ab')<sub>2</sub> fragment) from Jackson ImmunoResearch (PA, USA); anti-mouse IgG (Alexa Fluor 594, goat), anti-mouse IgG1 (Alexa Fluor 594, goat), anti-mouse IgG2a (Alexa Fluor 488, goat), and anti-rat IgG (Alexa Fluor 594, goat) from Thermo Fisher Scientific; anti-mouse IgG (HRP) from GE; anti-DSN1 (70-101) from BioAcademia (Osaka, Japan); anti-MIS12 (A300-776A) from Bethyl Laboratories; and anti-MIS12C (ABE2585) from Merck Millipore (Darmstadt, Germany). 7-Aminoactinomycin D was purchased from Bay Bioscience (Kobe, Japan).

#### Patient and public involvement

This research was done without patient involvement. Patients were not invited to comment on the study design and were not consulted to develop patient relevant outcomes or interpret the results. Patients were not invited to contribute to the writing or editing of this document for readability or accuracy.

#### Statistics

Continuous data are presented as the median and interquartile range (IQR) or as a number with the percentage value, as appropriate. The cutoff for the titer of each antibody specific for a centromere-related protein was determined by receiver operating characteristic (ROC) analysis, which was performed as the patients with ACA detected by ANA test were positive. Correlations between two continuous variables were analyzed using Spearman's rank correlation coefficient. Comparisons of continuous variables were performed by a two-sided Wilcoxon's test. Comparisons of categorical variables were performed by using the Chi-square test. A *P*-value < 0.05 was considered significant. All statistical analyses were performed with JMP 13 (SAS Institute, NC, USA).

## Supplementary tables

Supplementary table S1. Primers

| chain | PCR | Forward primer       | 5' - 3' sequence                                       |
|-------|-----|----------------------|--------------------------------------------------------|
| H,K,L | 1st | SMARTer 2A-F         | AAGCAGTGGTATCAACGCAGAGTAC                              |
| H     | 2nd | pME-NEB-VH1          | TGAGCTACGGACTCGAGCAGGTGCAGCTGGTGCAG                    |
| H     | 2nd | pME-NEB-VH1/5        | TGAGCTACGGACTCGAGGAGGTGCAGCTGGTGCAG                    |
| H     | 2nd | pME-NEB-VH3          | TGAGCTACGGACTCGAGGAGGTGCAGCTGGTGGAG                    |
| H     | 2nd | pME-NEB-VH3-23       | TGAGCTACGGACTCGAGGAGGTGCAGCTGTTGGAG                    |
| H     | 2nd | pME-NEB-VH4          | TGAGCTACGGACTCGAGCAGGTGCAGCTGCAGGAG                    |
| H     | 2nd | pME-NEB-VH4-34       | TGAGCTACGGACTCGAGCAGGTGCAGCTACAGCAGTG                  |
| H     | 2nd | pME-NEB-VH1-18       | TGAGCTACGGACTCGAGCAGGTTCAGCTGGTGCAG                    |
| H     | 2nd | pME-NEB-VH1-24       | TGAGCTACGGACTCGAGCAGGTCCAGCTGGTACAG                    |
| H     | 2nd | pME-NEB-VH3-33       | TGAGCTACGGACTCGAGCAGGTGCAGCTGGTGGAG                    |
| H     | 2nd | pME-NEB-VH3-9        | TGAGCTACGGACTCGAGGAAGTGCAGCTGGTGGAG                    |
| H     | 2nd | pME-NEB-VH4-39       | TGAGCTACGGACTCGAGCAGCTGCAGCTGCAGGAG                    |
| H     | 2nd | pME-NEB-VH6-1        | TGAGCTACGGACTCGAGCAGGTACAGCTGCAGCAG                    |
| K     | 2nd | pME-NEB-Vk1-5        | TGAGCTACGGACTCGAGGACATCCAGATGACCCAGTC                  |
| K     | 2nd | pME-NEB-Vk1-9        | TGAGCTACGGACTCGAGGACATCCAGTTGACCCAGTCT                 |
| K     | 2nd | pME-NEB-Vk1D-43      | TGAGCTACGGACTCGAGGCCATCCGGATGACCCA                     |
| K     | 2nd | pME-NEB-Vk2-24       | TGAGCTACGGACTCGAGGATATTGTGATGACCCAGACTCC               |
| K     | 2nd | pME-NEB-Vk2-28       | TGAGCTACGGACTCGAGGATATTGTGATGACTCAGTCTCC               |
| K     | 2nd | pME-NEB-Vk2-30       | TGAGCTACGGACTCGAGGATGTTGTGATGACTCAGTCTCC               |
| K     | 2nd | pME-NEB-Vk3-11       | TGAGCTACGGACTCGAGGAAATTGTGTTGACACAGTCTCC               |
| K     | 2nd | pME-NEB-Vk3-15       | TGAGCTACGGACTCGAGGAAATAGTATGACGCAGTCTCC                |
| K     | 2nd | pME-NEB-Vk3-20       | TGAGCTACGGACTCGAGGAAATTGTGTTGACGCAGTCT                 |
| K     | 2nd | pME-NEB-Vk4-1        | TGAGCTACGGACTCGAGGACATCGTGATGACCCAGTC                  |
| L     | 2nd | pME-NEB-VI1          | TGAGCTACGGACTCGAGCAGTCTGTGCTGACKCAGC                   |
| L     | 2nd | pME-NEB-VI2          | TGAGCTACGGACTCGAGCAGTCTGCCCTGACTCAGC                   |
| L     | 2nd | pME-NEB-VI3          | TGAGCTACGGACTCGAGTCTATGAGCTGACWCAGCC                   |
| L     | 2nd | pME-NEB-VI4/5        | TGAGCTACGGACTCGAGCAGCYTGTGCTGACTCAGTC                  |
| L     | 2nd | pME-NEB-VI6          | TGAGCTACGGACTCGAGAATTTTATGCTGACTCAGCCG                 |
| L     | 2nd | pME-NEB-VI7/8        | TGAGCTACGGACTCGAGCAGRCTGTGGTGACYCAG                    |
| H,K,L | 3rd | cell specific primer | TGAGCTACGGACTCGAG-(depend on variable region sequence) |

  

| chain  | PCR | Reverse primer | 5' - 3' sequence      |
|--------|-----|----------------|-----------------------|
| H(IgG) | 1st | IgG-1R         | TGAGTTCCACGACACCGTCAC |
| H(IgA) | 1st | IgA-1R         | TTCGCTCCAGGTCACACTGAG |

|            |     |                      |                                                 |
|------------|-----|----------------------|-------------------------------------------------|
| H(IgM)     | 1st | IgM-1R               | ACAAAGTGATGGAGTCGGGAAG                          |
| H(IgD)     | 1st | IgD-1R               | CCAGGACCACAGGGCTGTTATC                          |
| K          | 1st | IgK-1R               | TCCGAGCTCGGTACCAAGCTAACACTCTCCCCTGTTGAAGCTC     |
| L          | 1st | IgLs-1R              | TCCGAGCTCGGTACCAAGCTATGAACATTCTGTAGGGGCCACT     |
| L          | 1st | IgL3-1R              | TCCGAGCTCGGTACCAAGCTATGAACATTCCGTAGGGGCAAC      |
| L          | 1st | IgL6-1R              | TCCGAGCTCGGTACCAAGCTATGAACATTCTGCAGGGGCC        |
| H(IgG)     | 2nd | pME-NEB-IgG-R        | GATGGGCCCTTGTTGGA                               |
| H(IgA,M,D) | 2nd | cell specific primer | TGGGCCCTTGTTGGATG-(depend on junction sequence) |
| K          | 2nd | pME-NEB-IgK-R        | AGACTAGTCTAGCGGCCTAACACTCTCCCCTGTTGAAGCTC       |
| L          | 2nd | pME-NEB-IgLs-R       | AGACTAGTCTAGCGGCCTATGAACATTCTGTAGGGGCCACT       |
| L          | 2nd | pME-NEB-IgL3-R       | AGACTAGTCTAGCGGCCTATGAACATTCCGTAGGGGCAAC        |
| L          | 2nd | pME-NEB-IgL6-R       | AGACTAGTCTAGCGGCCTATGAACATTCTGCAGGGGCC          |

---

| chain       | Sequencing primer | 5' - 3' sequence             |
|-------------|-------------------|------------------------------|
| H(IgG)-band | IgG1234-R         | GAAGTAGTCCTTGACCAGGCAGC      |
| H(IgA)-band | IgA12-R           | TCACACTGAGTGGCTCCTGG         |
| H(IgM)-band | IgM-R             | TCGTATCCGACGGGGAATTC         |
| H(IgD)-band | IgD-R             | GGCTGTTATCCTTTGGGTGTCTG      |
| K-band      | IgK-R             | CTCTCTGGGATAGAAGTTATTCAGCAGG |
| L-band      | IgL-R             | GGCCGCGTACTTGTGTTG           |
| Vector      | pME18S-seqF       | CGGAAGTGTTACTTCTGCTCTAA      |



Supplementary table S2. Lesion antibody panel list

| ID       | Note | Heavy chain |      |   |    |                        |        |         | Light chain |    |              |        | Reactivity     |             |              |
|----------|------|-------------|------|---|----|------------------------|--------|---------|-------------|----|--------------|--------|----------------|-------------|--------------|
|          |      | Iso         | VH   | D | JH | CDR3                   | Length | Isotype | VL          | JL | CDR3         | Length | Polyreactivity | Main target | Other target |
| LB01-1H  |      | A           | 3-7  | 1 | 4  | VRGDNPEY               | 8      | κ       | 2-24        | 1  | MQATQFPRT    | 9      | -              | -           |              |
| LB01-2H  |      | A           | 5-51 | 3 | 6  | ARHGGIVNYYMDV          | 13     | κ       | 1-5         | 2  | QQYDTYPYT    | 9      | -              | SSA60       |              |
| LB01-3H  |      | A           | 1-18 | 5 | 4  | AKEWDSGFVGRFEV         | 14     | λ       | 3-25        | 2  | QSADISGPSVV  | 11     | -              | SSA60       |              |
| LB01-4H  |      | A           | 3-74 | 3 | 4  | VREYGSVYPIDY           | 13     | κ       | 6-21        | 3  | HQSRTLPLT    | 9      | -              | SSA52       |              |
| LB01-5H  |      | A           | 3-23 | 2 | 4  | AKEASLNIPVVTVVVGGAWFDS | 22     | λ       | 4-69        | 3  | QTWGPGFRV    | 9      | -              | -           |              |
| LB01-6H  |      | A           | 7-4  | 2 | 6  | ARSDCSSDSCLLGNYYYYMDV  | 23     | λ       | 3-19        | 3  | NSRDSSGHLCV  | 12     | -              | -           |              |
| LB01-7H  |      | M           | 3-30 | 6 | 4  | AKNRGYNSGWIFDY         | 14     | κ       | 1-33        | 4  | QQYDNLPLT    | 10     | -              | -           |              |
| LB01-8H  |      | A           | 5-51 | 3 | 6  | ARLGGIVNYYMDV          | 13     | κ       | 1-5         | 2  | QQYDSSPYT    | 9      | -              | SSA60       |              |
| LB01-9H  |      | A           | 4-30 | 3 | 6  | AKLSGSGTWRDYGADV       | 16     | λ       | 3-27        | 3  | YSSPENIGV    | 10     | -              | -           |              |
| LB01-11H |      | A           | 3-13 | 2 | 3  | TRAITGDDRINALDI        | 15     | κ       | 3-15        | 1  | QHFSNWPPWT   | 10     | -              | SSA60       |              |
| LB01-12H |      | A           | 1-3  | 2 | 4  | ATDYMGVTSTDY           | 12     | κ       | 3-11        | 4  | QQRYGWPPH    | 9      | -              | -           |              |
| LB01-13H |      | A           | 3-15 | 6 | 1  | ATRTRSASSWHAEIFQH      | 17     | λ       | 4-69        | 2  | QTWGTGIVL    | 9      | -              | -           |              |
| LB01-15H |      | G           | 3-9  | 6 | 3  | AKDIGRQWLPNECGSDV      | 17     | κ       | 1-39        | 1  | QQSYMSRT     | 9      | -              | SSA60       |              |
| LB01-17H |      | A           | 4-31 | 2 | 5  | ARGAPLSEADIVEPIKVLDS   | 21     | κ       | 4-1         | 4  | HQYYSLLT     | 8      | -              | SSA60       |              |
| LB01-18H |      | A           | 3-23 | 2 | 4  | VKSGGIATTLQWMSGGGH     | 18     | κ       | 1-39        | 4  | QQCYSHPLT    | 9      | -              | -           |              |
| LB01-19H |      | G           | 4-30 | 3 | 3  | ARVWASGRELGRAVFDI      | 17     | λ       | 1-40        | 2  | QTYDAGLSGSV  | 11     | -              | CBX5        |              |
| LB02-1H  |      | A           | 3-23 | 6 | 3  | AKGLKQQLVLSPFHT        | 15     | λ       | 2-14        | 2  | SSYAGSSTPSVV | 12     | -              | CBX5        | MIS12C       |
| LB02-2H  |      | A           | 1-18 | 6 | 5  | VRSGALAGRGGLSH         | 14     | κ       | 2-30        | 2  | MQGTHWPPT    | 9      | -              | -           |              |
| LB02-3H  |      | A           | 4-31 | 2 | 4  | AREGMISYLFDS           | 12     | λ       | 1-40        | 2  | QSYDSSLTGYYV | 12     | -              | -           |              |

|          |  |   |      |   |   |                      |    |   |       |   |              |    |   |        |  |
|----------|--|---|------|---|---|----------------------|----|---|-------|---|--------------|----|---|--------|--|
| LB02-4H  |  | A | 3-15 | 2 | 3 | TTGPPLDN             | 8  | λ | 1-51  | 1 | GTWDNSRRVHYV | 12 | - | -      |  |
| LB02-5H  |  | A | 3-30 | 5 | 6 | AKEDVDIVRAPVVGAGHMDV | 21 | λ | 3-21  | 3 | QVWESRSYQWV  | 11 | - | CENP-C |  |
| LB02-6H  |  | M | 4-59 | 5 | 4 | ARRWSGYDPEDY         | 12 | λ | 1-44  | 3 | AAWDDSLNGLWV | 12 | - | -      |  |
| LB02-7H  |  | A | 3-48 | 3 | 6 | ARGGSIKVGFYIDV       | 16 | λ | 3-1   | 2 | LWWDSDNMV    | 9  | - | -      |  |
| LB02-9H  |  | A | 3-23 | 6 | 4 | AQEERRGSPYDS         | 13 | κ | 3-15  | 1 | QQYKAAPVA    | 9  | - | -      |  |
| LB02-10H |  | A | 3-21 | 3 | 4 | ASGLDYDILTYYSFDF     | 17 | κ | 1-NL1 | 4 | QQFYSLPLT    | 9  | - | CENP-C |  |
| LB02-12H |  | A | 4-31 | 5 | 4 | AREGMATSILDS         | 12 | λ | 1-40  | 2 | QSYDTGLSGFVV | 12 | - | -      |  |
| LB02-13H |  | A | 4-39 | 6 | 4 | ARRSPREDGRSFDS       | 14 | κ | 2-28  | 5 | MQAQQTPPT    | 9  | - | -      |  |
| LB02-15H |  | A | 5-51 | 3 | 4 | ARVNSTSSGDALDY       | 14 | λ | 3-25  | 2 | QSADSSGNFVV  | 11 | - | CENP-C |  |
| LB02-16H |  | A | 1-69 | 6 | 4 | ARYRPASGTSDF         | 14 | κ | 1-39  | 1 | QQSYSTPLT    | 9  | - | -      |  |
| LB02-18H |  | A | 3-30 | 2 | 3 | TTSTSNLPGTFDI        | 13 | κ | 1-39  | 1 | QQSHGVPWT    | 9  | - | MIS12C |  |
| LB02-19H |  | A | 4-39 | 6 | 4 | SRLKGSAGTLAY         | 12 | κ | 3-11  | 4 | QQRSNWPPRLT  | 11 | - | -      |  |
| LB02-21H |  | A | 3-23 | 6 | 4 | ATSESISVAQYLY        | 13 | λ | 3-21  | 2 | QVWDSSSEHVV  | 11 | - | -      |  |
| LB02-22H |  | A | 3-48 | 6 | 1 | AIAGSTAWAPGIPRPDYFQH | 21 | κ | 4-1   | 4 | QQYYGVPLT    | 9  | - | -      |  |
| LB02-25H |  | A | 3-15 | 1 | 4 | TTALGTN              | 7  | κ | 4-1   | 4 | QQYYGVPLT    | 9  | - | -      |  |
| LB02-26H |  | A | 4-30 | 2 | 5 | ARFRSAAADGDGSWFDP    | 17 | κ | 1-6   | 4 | VQTNAYPFT    | 9  | - | -      |  |
| LB02-27H |  | A | 3-21 | 3 | 4 | ARREGFGFSYD          | 11 | κ | 1-9   | 5 | QQVNNYLGT    | 9  | - | CENP-C |  |
| LB02-28H |  | G | 3-43 | 6 | 3 | AKDIKFTNSADAFDL      | 15 | λ | 2-23  | 2 | GSYAGHTSVF   | 11 | - | -      |  |
| LB02-29H |  | A | 3-23 | 3 | 3 | AAARYDILTDHPNAFDI    | 17 | λ | 3-21  | 2 | QVWDGNSDHVV  | 11 | - | CENP-C |  |
| LB02-30H |  | A | 3-33 | 6 | 4 | ARETDIASPHSGPLDY     | 16 | κ | 4-1   | 2 | QQYYSTPPYT   | 10 | - | CENP-A |  |
| LB02-31H |  | A | 3-7  | 6 | 4 | VGQEVSGLPDY          | 12 | κ | 4-1   | 4 | QQYYGVPLT    | 9  | - | -      |  |
| LB11-1H  |  | A | 3-21 | 1 | 4 | ARDLSEHSYYSIFYDF     | 20 | κ | 3-15  | 4 | QQYDKWPPLT   | 10 | - | -      |  |

|          |   |      |   |   |                        |    |   |       |   |             |    |   |   |  |
|----------|---|------|---|---|------------------------|----|---|-------|---|-------------|----|---|---|--|
| LB11-2H  | A | 3-73 | 1 | 6 | TRVTKATPKSNYMDV        | 15 | κ | 1D-16 | 4 | QQYNTFPIT   | 9  | - | - |  |
| LB11-3H  | A | 3-48 | 3 | 4 | VRELLDFYSGSTFDS        | 15 | κ | 1-12  | 4 | QQTNSFPT    | 8  | - | - |  |
| LB11-4H  | A | 1-2  | 2 | 3 | AKEMGTCCGGDCSGDAFDL    | 18 | λ | 1-51  | 1 | GIWDSRLTTGV | 11 | - | - |  |
| LB11-5H  | A | 4-59 | 4 | 4 | ARGTRLRPFDS            | 11 | κ | 1-16  | 3 | LQYNVYPLT   | 9  | - | - |  |
| LB11-6H  | A | 1-18 | 3 | 4 | ATDRNSVIMYY            | 11 | κ | 1-33  | 2 | QQSDNVPYT   | 9  | - | - |  |
| LB11-7H  | A | 4-39 | 4 | 4 | VKPYSNYGFDY            | 11 | κ | 1-39  | 4 | QQSYSSPLALT | 11 | - | - |  |
| LB11-8H  | A | 3-23 | 2 | 4 | AKGSAIDS               | 8  | κ | 2-30  | 1 | MQAIHWPRT   | 9  | - | - |  |
| LB11-9H  | A | 3-72 | 3 | 3 | ARVVDYDGAGYSVDAFDV     | 19 | λ | 1-51  | 2 | GTWDGTLNEVL | 11 | - | - |  |
| LB11-10H | A | 3-49 | 6 | 6 | SRVPYIATGNIIYSYIDV     | 19 | λ | 2-14  | 2 | SSFTAVTNLLV | 11 | - | - |  |
| LB11-11H | A | 3-21 | 6 | 6 | AREGQNYANSGYYYYYMDV    | 19 | λ | 3-19  | 1 | NSRDGSGNYV  | 10 | - | - |  |
| LB11-12H | A | 3-13 | 2 | 5 | VRGLRGGLDP             | 10 | λ | 1-51  | 2 | ATWDNSLSAVL | 11 | - | - |  |
| LB11-13H | A | 4-4  | 3 | 4 | ARGGAMFDF              | 10 | κ | 3-20  | 2 | QQYDHSVIYT  | 10 | - | - |  |
| LB11-14H | A | 3-23 | 2 | 4 | AKGSAIDS               | 8  | κ | 1-39  | 4 | QQSSRPPLT   | 9  | - | - |  |
| LB11-15H | A | 4-59 | 3 | 3 | ARSDNGDYSDALDI         | 14 | λ | 3-25  | 1 | QSGDGSGSYF  | 10 | - | - |  |
| LB11-16H | A | 3-30 | 3 | 6 | ARDRRVYGGSGWQYYFYGMVDV | 21 | λ | 6-57  | 3 | QSSHVSNRWV  | 10 | - | - |  |
| LB11-17H | A | 2-5  | 2 | 4 | VHASMTKY               | 8  | κ | 2-30  | 1 | MQVTYLWT    | 8  | - | - |  |
| LB11-18H | A | 3-15 | 5 | 1 | STDVPGSGDGYNLYFQR      | 17 | κ | 3-15  | 4 | QQYTNWPLT   | 9  | - | - |  |
| LB11-19H | A | 3-48 | 2 | 3 | VRVGSGGAFDL            | 11 | κ | 3-15  | 3 | HQYNNWPFT   | 9  | - | - |  |
| LB11-20H | A | 4-38 | 3 | 6 | VRQDLLFYAMDV           | 12 | λ | 1-44  | 1 | AAWDDRMNEYV | 11 | - | - |  |
| LB11-21H | A | 4-39 | 5 | 5 | AKVSPYTTSQIEMERADWFGS  | 21 | λ | 1-44  | 3 | EVWDDNVSGPV | 11 | - | - |  |
| LB11-22H | A | 4-34 | 5 | 6 | RLSSRREYSYGNYYSYVDV    | 20 | λ | 1-47  | 1 | ATWDDSRTPYL | 12 | - | - |  |
| LB11-23H | A | 4-39 | 3 | 5 | VRDRAVGRLLNKGPPIRTQKDL | 22 | λ | 1-51  | 1 | ATWDSGLPAYL | 11 | - | - |  |

|          |   |      |   |   |                     |    |   |      |   |              |    |   |       |  |
|----------|---|------|---|---|---------------------|----|---|------|---|--------------|----|---|-------|--|
| LB11-24H | A | 1-45 | 4 | 5 | AMTSVDGAGDYVLGL     | 15 | κ | 3-15 | 1 | HQYNDSPPT    | 9  | - | -     |  |
| LB11-25H | A | 1-2  | 2 | 3 | AKEMGTCCGGDCSGDAFDL | 18 | λ | 1-51 | 1 | GIWDSRLTTGV  | 11 | - | -     |  |
| LB11-26H | A | 3-43 | 2 | 4 | AKAVYGGDWISLEY      | 14 | κ | 2-28 | 2 | MQGLQIPYT    | 9  | - | -     |  |
| LB11-28H | A | 4-59 | 3 | 5 | ARRILSERPTSRYNWLDP  | 18 | κ | 3-11 | 4 | QQRSVWPLT    | 9  | - | -     |  |
| LB11-30H | A | 1-46 | 1 | 4 | AQESHDNWNYVAY       | 13 | κ | 1-39 | 2 | QQSYSTPYT    | 9  | - | -     |  |
| LB11-31H | A | 3-21 | 3 | 4 | AKSSQDFKGYIDF       | 13 | κ | 1-6  | 2 | LQNYFYPFT    | 9  | - | -     |  |
| LB11-32H | A | 4-34 | 2 | 5 | IRGCGGDCYEGFDV      | 14 | λ | 3-25 | 3 | QSV DSTNIFWV | 11 | - | -     |  |
| LB12-1H  | A | 5-51 | 4 | 5 | ARKRIQWNTVDP        | 12 | κ | 2-28 | 2 | MQALQTPYI    | 9  | - | -     |  |
| LB12-2H  | A | 3-23 | 3 | 5 | ARGGISKGMST         | 11 | κ | 1-16 | 4 | QQYNNYPLT    | 9  | - | -     |  |
| LB12-3H  | A | 3-23 | 3 | 4 | AKDGSSSLYDY         | 11 | λ | 3-19 | 3 | HSRDSSGYRV   | 10 | - | SSA60 |  |
| LB12-4H  | A | 3-9  | 4 | 4 | TKDAMTSVTKGGRYFFDS  | 18 | κ | 4-1  | 1 | QQYFDPPT     | 9  | - | -     |  |
| LB12-6H  | A | 4-34 | 6 | 3 | ARTPRGSLQTRLGASDM   | 17 | κ | 1-5  | 2 | QHYSYPYT     | 9  | - | -     |  |
| LB12-7H  | A | 3-13 | 7 | 4 | ARANWPGYFDY         | 11 | κ | 4-1  | 1 | QQYYNTPRT    | 9  | - | SSA60 |  |
| LB12-8H  | A | 1-18 | 5 | 4 | ARDWGASGKGFY        | 13 | κ | 3-15 | 1 | QQYNTWPRT    | 9  | - | SSA60 |  |
| LB12-9H  | A | 3-23 | 3 | 4 | AKGGQLQFDS          | 10 | λ | 2-11 | 3 | CSYAGNYTWV   | 10 | - | SSA60 |  |
| LB12-10H | A | 3-23 | 6 | 4 | TKGGQLQFDS          | 10 | λ | 2-11 | 3 | CSYVGNYSWV   | 10 | - | SSA60 |  |
| LB12-11H | A | 1-69 | 2 | 4 | GRVPIGGDTYFDY       | 13 | λ | 3-19 | 3 | NSRDSSGNHWV  | 11 | - | SSB   |  |
| LB12-12H | A | 2-5  | 3 | 6 | AHSLWFGDYGLDV       | 15 | κ | 2-28 | 1 | MQALQSQT     | 8  | - | -     |  |
| LB12-13H | A | 3-23 | 6 | 4 | AKGGQLQFDS          | 10 | λ | 2-11 | 3 | CSYAGNYTWV   | 10 | - | SSA60 |  |
| LB12-14H | A | 3-15 | 1 | 4 | TTYSGNFKLDY         | 11 | λ | 2-8  | 2 | SSYVYGNTLK   | 10 | - | -     |  |
| LB12-15H | A | 1-69 | 2 | 4 | ASVPIAGEKSFHDH      | 13 | λ | 3-19 | 3 | NSRDNSGDHWV  | 11 | - | SSB   |  |
| LB12-16H | A | 3-9  | 3 | 4 | AKVGGYYDSSGYFFDC    | 16 | λ | 2-8  | 2 | SSYVGTTSV    | 10 | - | -     |  |

|          |  |   |      |   |   |                   |    |   |      |   |             |    |   |       |                               |
|----------|--|---|------|---|---|-------------------|----|---|------|---|-------------|----|---|-------|-------------------------------|
| LB12-17H |  | A | 4-4  | 3 | 5 | VRSLIGGIMASFEFDP  | 16 | λ | 2-11 | 2 | CSYAGSYTFV  | 10 | - | -     |                               |
| LB12-18H |  | A | 5-51 | 1 | 5 | ARHQGLGAWFDP      | 12 | λ | 1-40 | 3 | QSYDTRLGSPV | 11 | - | -     |                               |
| LB12-19H |  | A | 3-74 | 6 | 4 | ARGGYTTGRQPFDY    | 14 | λ | 4-69 | 2 | QTWGTGIVI   | 9  | - | -     |                               |
| LB12-24H |  | A | 3-53 | 2 | 4 | AVKLRVVTATQGDVGLY | 17 | κ | 1-5  | 1 | QQYNShSWT   | 9  | - | -     |                               |
| LB12-30H |  | A | 5-51 | 1 | 5 | ARHQGLGAWFDP      | 12 | λ | 1-40 | 3 | QSYDTRLGSPV | 11 | - | -     |                               |
| LB12-31H |  | A | 1-18 | 3 | 4 | ARDQGPITMKVVANPHY | 17 | κ | 1-33 | 4 | QQYDNLPTT   | 9  | - | -     |                               |
| LB20-1H  |  | G | 3-30 | 7 | 6 | AKGGLSGASLGLDV    | 14 | κ | 2-28 | 2 | MQALQPTYT   | 9  | - | SSB   | SSA52                         |
| LB20-3H  |  | D | 3-30 | 2 | 6 | ARDRIQFWLSYSDMDV  | 16 | κ | 3-15 | 4 | QQYNGPPLT   | 10 | - | -     |                               |
| LB20-4H  |  | G | 1-18 | 3 | 4 | ARDDGRGYFDH       | 11 | κ | 3-11 | 1 | QQRANWPRT   | 9  | - | SSB   | SSA52                         |
| LB20-7H  |  | A | 3-13 | 2 | 2 | ARTHYDTGGFAAGFDL  | 16 | κ | 3-20 | 4 | QQDDASPLT   | 9  | - | -     |                               |
| LB20-8H  |  | G | 5-51 | 6 | 5 | ATHMVTVPGTDSF     | 13 | κ | 2-40 | 3 | MQRIEFPFT   | 9  | - | SSB   |                               |
| LB20-14H |  | G | 3-15 | 3 | 6 | TTEGSGSPYYFYGV DV | 17 | κ | 1-39 | 2 | QQSYSTPFT   | 9  | - | SSB   |                               |
| LB20-18H |  | G | 4-4  | 4 | 6 | AKLSGSTVTTWMYGMDV | 17 | λ | 7-46 | 3 | LLSYSGARV   | 9  | - | -     |                               |
| LB20-21H |  | A | 3-15 | 6 | 6 | TTAAGTYYYYYGMDV   | 15 | κ | 3-20 | 1 | QQYGSSTGT   | 9  | - | -     |                               |
| LB20-22H |  | G | 1-3  | 6 | 4 | AREGIGAAGHFDY     | 13 | κ | 1-33 | 4 | QQYEDFLS    | 8  | - | SSB   |                               |
| LB20-25H |  | D | 2-5  | 2 | 4 | TRRRHFSYDFDY      | 12 | λ | 2-18 | 2 | SSYTTTGADLI | 11 | - | -     |                               |
| LB20-26H |  | A | 7-4  | 6 | 4 | ARDTSDSSSWYFDY    | 14 | λ | 2-14 | 2 | SSYTSSNTRL  | 10 | - | -     |                               |
| LB20-28H |  | A | 3-30 | 3 | 3 | GRNERPTTGS LGAFDI | 16 | κ | 3-15 | 1 | QQSDNWPPYT  | 10 | - | -     |                               |
| LB20-32H |  | D | 2-5  | 2 | 4 | ARRRQESSDFDY      | 12 | λ | 2-18 | 2 | SSYSSTNNYVI | 11 | - | -     |                               |
| LB20-34H |  | G | 4-4  | 5 | 6 | VRMSVPEIYYFHGLDV  | 16 | κ | 1-27 | 1 | QKYNAPRT    | 9  | + | SSA60 | CENP-A,<br>CENP-B,<br>CENP-C, |

|          |  |   |      |   |   |                      |    |   |      |   |              |    |   |       |     |                 |
|----------|--|---|------|---|---|----------------------|----|---|------|---|--------------|----|---|-------|-----|-----------------|
|          |  |   |      |   |   |                      |    |   |      |   |              |    |   |       |     | SSA52,<br>SSA60 |
| LB20-36H |  | G | 3-33 | 1 | 4 | AKDRGSYYLDS          | 11 | κ | 3-15 | 4 | QHYNWPR      | 8  | - | SSB   |     |                 |
| LB20-38H |  | G | 3-23 | 2 | 4 | VRHRPSGGWRSVDFD      | 15 | κ | 3-20 | 3 | HQYGSSPLFT   | 10 | - | SSB   |     |                 |
| LB20-39H |  | A | 4-31 | 3 | 3 | ATYGSGRGAFDI         | 12 | κ | 2-28 | 2 | MQALQTLTY    | 9  | - | -     |     |                 |
| LB20-40H |  | A | 3-23 | 5 | 4 | AKVPPQYTYGPLDY       | 14 | κ | 1-39 | 2 | QQSYTTPPS    | 9  | - | -     |     |                 |
| LB20-41H |  | D | 2-5  | 3 | 4 | ARRRHQSYDFDS         | 12 | λ | 2-18 | 2 | SSYTTSGLV    | 10 | - | -     |     |                 |
| LB20-43H |  | G | 3-21 | 6 | 6 | AKDLGGAAGGMDV        | 14 | κ | 4-1  | 1 | QQYYSTPKT    | 9  | - | SSB   |     |                 |
| LB20-44H |  | G | 3-21 | 6 | 6 | AKDLGGAAGGMDV        | 14 | λ | 2-14 | 2 | SSYTRTSNVV   | 10 | - | -     |     |                 |
| LB20-45H |  | G | 1-46 | 3 | 4 | ATFSRMIRGVIAN        | 14 | λ | 2-14 | 2 | SSYTGTTLGHVV | 13 | - | SSA60 |     |                 |
| LB20-46H |  | G | 3-74 | 4 | 5 | VRDASINKMDH          | 11 | κ | 3-20 | 4 | QQYGSFPLT    | 9  | - | -     |     |                 |
| LB20-47H |  | M | 4-61 | 3 | 4 | ARADYEDMGSEFDY       | 13 | κ | 3-11 | 4 | QQRSNWPLT    | 9  | - | -     |     |                 |
| LB20-48H |  | A | 4-61 | 3 | 4 | ARGGAHYDILTAYASYSFDY | 20 | κ | 1-39 | 1 | QQSSSTPWT    | 9  | - | -     |     |                 |
| LB20-49H |  | A | 4-39 | 3 | 6 | ARSPSRDYYSYGMID      | 17 | κ | 3-20 | 5 | QSYSGSPRVS   | 10 | - | -     |     |                 |
| LB20-50H |  | A | 3-15 | 6 | 3 | TTEMDSYAFDI          | 12 | λ | 1-44 | 1 | AAWDDSLNAYV  | 12 | - | -     |     |                 |
| LB20-51H |  | A | 7-4  | 7 | 4 | ARHSTGEAFFDY         | 12 | λ | 3-19 | 2 | NSRDSSGKHL   | 11 | - | -     |     |                 |
| LB20-53H |  | G | 3-30 | 6 | 4 | AREKSGIVASGIDY       | 14 | κ | 1-6  | 1 | LQDYDYPWT    | 9  | - | SSA60 | SSB |                 |
| LB20-55H |  | G | 4-39 | 3 | 4 | ARLGGDTSVDYFDS       | 14 | λ | 1-40 | 3 | QSYDSSLSALV  | 11 | - | -     |     |                 |
| LB20-57H |  | G | 3-7  | 1 | 4 | ARGREWDLPNQFFDC      | 15 | κ | 4-1  | 1 | QQYYSTPWT    | 9  | - | -     |     |                 |
| LB20-58H |  | A | 3-15 | 3 | 4 | FYKNRAVGY            | 9  | λ | 1-40 | 3 | QSYDNTLSGSWV | 12 | - | -     |     |                 |
| LB20-59H |  | A | 7-4  | 3 | 5 | ARDVTSSSGSGSYFWFDP   | 18 | λ | 1-51 | 3 | GTWDSLSAWV   | 11 | - | -     |     |                 |
| LB20-61H |  | A | 4-39 | 6 | 6 | ARDNSGWTTSYQYGMIDV   | 18 | λ | 3-1  | 1 | QAWDSSTHV    | 9  | - | -     |     |                 |
| LB20-62H |  | A | 3-33 | 4 | 4 | VKDVGVDYAGADY        | 13 | λ | 2-14 | 2 | ASYTRNNAL    | 9  | - | SSA60 |     |                 |

|          |  |   |      |   |   |                    |    |   |      |   |              |    |   |       |                            |
|----------|--|---|------|---|---|--------------------|----|---|------|---|--------------|----|---|-------|----------------------------|
| LB20-63H |  | A | 4-39 | 3 | 4 | GRMEGVWFEGEPFDN    | 15 | λ | 1-40 | 2 | QSYDTDLTNVV  | 11 | - | -     |                            |
| LB20-66H |  | G | 7-4  | 3 | 5 | ARGDRDGSPPDHANWFDP | 18 | λ | 3-25 | 3 | LSADSRATFWV  | 11 | - | -     |                            |
| LB20-67H |  | A | 1-69 | 5 | 5 | TRDRHVVPQGIWFDP    | 16 | λ | 2-14 | 3 | SSYTSRRTPWV  | 11 | - | -     |                            |
| LB20-72H |  | M | 7-4  | 3 | 6 | ARDRFGREGMDV       | 12 | κ | 2-28 | 3 | MQALQTSFT    | 9  | - | -     |                            |
| LB20-73H |  | G | 3-23 | 4 | 4 | GKERWSKVTPRGYFDD   | 16 | λ | 2-11 | 2 | CSYAGNNTLI   | 10 | - | SSB   |                            |
| LB20-76H |  | A | 3-15 | 6 | 5 | TAFGSGWT           | 8  | λ | 1-47 | 2 | AAWDDSLSVL   | 11 | - | -     |                            |
| LB20-77H |  | A | 4-39 | 2 | 5 | ARHPRGGYGGWFDP     | 14 | κ | 3-11 | 2 | QQRSNWLVT    | 9  | - | -     |                            |
| LB20-78H |  | A | 3-23 | 1 | 4 | AKFDSGSFWVGVDYFDY  | 17 | κ | 3-20 | 4 | QQYGSSPQVT   | 10 | - | -     |                            |
| LB20-79H |  | G | 1-2  | 6 | 6 | AKGDGTLIYGLDA      | 13 | λ | 1-51 | 2 | GTWDSSTLAGV  | 11 | - | SSB   |                            |
| LB20-80H |  | G | 3-30 | 2 | 4 | ARGNGAYQVPSALQY    | 15 | κ | 3-15 | 2 | QQFNKWPYT    | 9  | + | SSB   | CENP-B,<br>SSA52,<br>SSA60 |
| LB20-83H |  | A | 4-59 | 1 | 5 | ARHLGDASTWFDP      | 13 | λ | 3-1  | 2 | QAWDSTYAV    | 9  | - | -     |                            |
| LB20-84H |  | G | 4-31 | 3 | 3 | ARDSRFGGNAFDI      | 13 | κ | 1-17 | 1 | LQHNSYPWT    | 9  | - | -     |                            |
| LB20-85H |  | G | 3-48 | 3 | 4 | TRFPVGDVLSVYFDY    | 16 | λ | 3-1  | 2 | QVWDSNSV     | 9  | - | SSA60 |                            |
| LB20-86H |  | A | 7-4  | 1 | 4 | ARDFNWNDGPYYFDS    | 15 | λ | 6-57 | 3 | QSYDSSNQG    | 10 | - | -     |                            |
| LB20-89H |  | A | 6-1  | 3 | 4 | ARDGSSPYLITDYLDH   | 16 | λ | 1-51 | 2 | ATWDRTLDMV   | 11 | - | -     |                            |
| LB20-91H |  | G | 7-4  | 2 | 4 | TRDQGSYLIDY        | 12 | λ | 2-14 | 2 | TSCTVSSTV    | 10 | - | -     |                            |
| LB20-92H |  | A | 3-7  | 5 | 4 | AREGLDTAFDY        | 11 | λ | 1-40 | 3 | QSYDNTLSGSWV | 12 | - | -     |                            |
| LB20-93H |  | G | 3-7  | 3 | 4 | ARESSGRHTTKFDY     | 14 | κ | 1-33 | 2 | QQYDNLPT     | 9  | - | -     |                            |
| LB20-94H |  | A | 3-30 | 3 | 4 | AKDIYGSYSYNGPLDY   | 17 | κ | 3-15 | 1 | QQYNNWPRT    | 9  | - | -     |                            |
| LB23-1H  |  | A | 4-31 | 5 | 3 | TREETAQLWERKALDV   | 17 | κ | 2-24 | 1 | SQGLQFPRT    | 9  | - | -     |                            |
| LB23-2H  |  | A | 1-46 | 6 | 4 | ATAIAAAPPEGRDY     | 14 | λ | 2-14 | 1 | RSYASSTYV    | 10 | - | -     |                            |

|          |  |   |      |   |   |                      |    |   |       |   |               |    |   |   |  |
|----------|--|---|------|---|---|----------------------|----|---|-------|---|---------------|----|---|---|--|
| LB23-3H  |  | A | 3-21 | 2 | 4 | ARDAPLAYCGGDCYSLFDY  | 19 | κ | 1-12  | 5 | QQANSFPIA     | 9  | - | - |  |
| LB23-4H  |  | A | 1-18 | 1 | 6 | ARISGTYAPVYGLDV      | 15 | λ | 2-8   | 1 | SSYSGSNNYV    | 10 | - | - |  |
| LB23-5H  |  | A | 6-1  | 2 | 4 | ARGRNSAFDY           | 10 | κ | 4-1   | 3 | QQYYTTPEFT    | 10 | - | - |  |
| LB23-6H  |  | A | 5-51 | 6 | 1 | ARQGKSWPSSAPFFEI     | 16 | κ | 4-1   | 1 | QQYYDFPRT     | 9  | - | - |  |
| LB23-8H  |  | A | 3-15 | 2 | 4 | TTGNMPFYDFD          | 11 | λ | 2-14  | 1 | SAYTGSITPVFL  | 12 | - | - |  |
| LB23-9H  |  | A | 3-11 | 3 | 3 | ARERFGSGTYDAFDI      | 15 | λ | 2-8   | 2 | SSFAGTSGFV    | 10 | - | - |  |
| LB23-10H |  | A | 4-31 | 1 | 4 | ARGYGGTTGYDFD        | 13 | λ | 1-51  | 3 | ATWDSLSARV    | 11 | - | - |  |
| LB23-11H |  | A | 3-48 | 3 | 4 | ARGLTGGYYGSGNFGY     | 16 | λ | 3-21  | 1 | QVWDTTTLNMGV  | 11 | - | - |  |
| LB23-12H |  | A | 4-39 | 4 | 4 | ARITMMVDY            | 9  | κ | 1-8   | 4 | QQYYSYPLT     | 9  | - | - |  |
| LB23-13H |  | A | 4-59 | 7 | 3 | ARPNRGEAWGAFDI       | 14 | κ | 2-28  | 2 | MQALEDPYT     | 9  | - | - |  |
| LB23-14H |  | A | 1-46 | 3 | 4 | ARDGKSLTGFYGLLPDF    | 17 | κ | 4-1   | 1 | QQYFSTVASS    | 10 | - | - |  |
| LB23-15H |  | A | 5-51 | 6 | 3 | AKQLIPTKSEDDLTHPDFV  | 19 | κ | 4-1   | 1 | QQYYNSPGT     | 9  | - | - |  |
| LB23-17H |  | A | 1-69 | 5 | 6 | ARGPGYSGYERDYPYYGMDV | 21 | κ | 1-NL1 | 1 | QQYYTIPWT     | 9  | - | - |  |
| LB23-18H |  | A | 2-5  | 4 | 4 | GHVDPDLGDFHFDF       | 14 | λ | 2-14  | 3 | ASYRTGRDLDDWV | 13 | - | - |  |
| LB24-1H  |  | A | 1-3  | 3 | 4 | ARATLPRYWDY          | 11 | κ | 1-NL1 | 3 | QHYAGSPFA     | 9  | - | - |  |
| LB24-2H  |  | A | 3-73 | 3 | 6 | SRQKVGFPYGLDV        | 14 | λ | 3-10  | 3 | YSADSGGNYKV   | 11 | - | - |  |
| LB24-3H  |  | G | 4-59 | 2 | 4 | ARGVGPTSROGRLDY      | 15 | κ | 1-5   | 1 | QQYNSYPWT     | 9  | - | - |  |
| LB24-4H  |  | M | 4-39 | 5 | 4 | AREKMGTFSLDS         | 12 | κ | 3-20  | 3 | QQYGNPPTFT    | 11 | - | - |  |
| LB24-5H  |  | G | 5-51 | 4 | 4 | AKLRRGIVLSTGAFDS     | 16 | κ | 1-9   | 1 | QQVNGYPRT     | 9  | - | - |  |
| LB24-6H  |  | G | 4-61 | 6 | 4 | ARESGIGSSTWLNIFYDY   | 17 | κ | 1-5   | 1 | QQYSSFPWT     | 9  | - | - |  |
| LB24-7H  |  | G | 4-61 | 6 | 4 | ARESGIGSSTWLNIFYDY   | 17 | λ | 2-14  | 1 | NSYTTTGTYYV   | 10 | - | - |  |
| LB24-8H  |  | A | 3-66 | 4 | 4 | ARVTVVTRFDS          | 12 | λ | 2-14  | 3 | SSFTSSSTWV    | 10 | - | - |  |



|          |          |   |      |   |   |                         |    |   |      |   |              |    |   |       |  |
|----------|----------|---|------|---|---|-------------------------|----|---|------|---|--------------|----|---|-------|--|
| LB24-9H  |          | G | 4-59 | 2 | 6 | ARPNSYFSYSMDV           | 13 | λ | 1-47 | 3 | AAWDDSLSGPV  | 11 | - | SSA60 |  |
| LB24-10H |          | G | 3-23 | 6 | 4 | VKGLWGILAADPFDS         | 15 | κ | 3-15 | 1 | QQYNNNGWT    | 8  | - | SSA60 |  |
| LB24-11H |          | A | 3-15 | 1 | 4 | TTGTWALFDY              | 10 | κ | 2-30 | 2 | MQGTRWPYT    | 9  | - | -     |  |
| LB24-12H |          | A | 1-18 | 6 | 5 | ARVVS RADNWLDP          | 13 | λ | 1-40 | 3 | QSYDISLSSWV  | 11 | - | SSA60 |  |
| LB24-13H |          | A | 4-39 | 3 | 5 | ATPIAASGWFDP            | 12 | κ | 3-20 | 4 | QQYGSSPLT    | 9  | - | -     |  |
| LB24-14H |          | G | 3-30 | 3 | 4 | ARLMGPWLPTGPYSS         | 15 | κ | 3-15 | 2 | QQYNKWYT     | 8  | + | SSB   |  |
| LB24-15H |          | A | 3-64 | 1 | 4 | VKQGWAAYSGNLDFD         | 15 | λ | 7-46 | 2 | LLSFGAARV    | 9  | - | -     |  |
| LB24-16H |          | G | 3-74 | 3 | 4 | ARGDFYDSVGYQPPRH        | 16 | λ | 1-47 | 2 | ATWDYSLSGPV  | 11 | - | SSA52 |  |
| LB24-18H |          | G | 3-30 | 4 | 4 | ARSWPYGDYFDF            | 12 | κ | 1-17 | 1 | LQHNNYPRT    | 9  | - | -     |  |
| LB24-19H |          | A | 1-18 | 6 | 5 | ALVLSRTDNWLDP           | 13 | λ | 1-40 | 3 | QSSDSSLSTWV  | 11 | - | -     |  |
| LB24-21H |          | M | 3-30 | 1 | 4 | ARDGNPEIIVGAVYYFDY      | 18 | κ | 3-20 | 4 | QQYGSSPPLT   | 10 | - | -     |  |
| LB25-1H  |          | G | 3-30 | 1 | 4 | AKDPSRYNWYADH           | 14 | λ | 3-19 | 3 | NSRDSSNNPSWV | 12 | - | -     |  |
| LB25-5H  |          | M | 3-11 | 2 | 6 | AREACSGATCYRPEVYSNYGMDV | 23 | κ | 3-15 | 1 | QHYNWPPWT    | 10 | - | -     |  |
| LB25-7H  |          | G | 3-30 | 1 | 4 | AREMKQGATGSRFFDF        | 16 | λ | 3-1  | 1 | QAWAFSAAV    | 9  | - | SSA52 |  |
| LB25-8H  | =LB25-1H | G | 3-30 | 1 | 4 | AKDPSRYNWYADH           | 14 | λ | 3-19 | 3 | NSRDSSNNPSWV | 12 | - | -     |  |
| LB25-9H  | =LB25-7H | G | 3-30 | 1 | 4 | AREMKQGATGSRFFDF        | 16 | λ | 3-1  | 1 | QAWAFSAAV    | 9  | - | SSA52 |  |
| LB25-10H |          | A | 3-23 | 6 | 5 | AKDRLATPGTGWFDP         | 15 | κ | 1-39 | 2 | QTYNTLNT     | 9  | - | SSA52 |  |
| LB25-11H | =LB25-7H | G | 3-30 | 1 | 4 | AREMKQGATGSRFFDF        | 16 | λ | 3-1  | 1 | QAWAFSAAV    | 9  | - | SSA52 |  |
| LB25-14H |          | A | 5-51 | 2 | 1 | ARAQYCGGDCGSLFQY        | 16 | κ | 1-5* | 1 | QQYYTYPWT    | 9  | - | -     |  |
| LB25-15H |          | A | 4-39 | 5 | 5 | ARVGYSYGRRFDP           | 13 | λ | 1-51 | 2 | EKWDP RVSSVA | 11 | - | -     |  |
| LB25-17H |          | A | 1-46 | 3 | 3 | ARYPGDSSGYIDSFDV        | 16 | λ | 1-40 | 3 | QSYDNTLSGSWV | 12 | - | -     |  |
| LB25-18H |          | A | 4-39 | 3 | 3 | ARLLGYNGSGSYPGVVSGFDI   | 21 | λ | 2-23 | 2 | CSFAGSSTWV   | 11 | - | -     |  |

|          |           |   |      |   |   |                         |    |   |       |   |               |    |   |       |  |
|----------|-----------|---|------|---|---|-------------------------|----|---|-------|---|---------------|----|---|-------|--|
| LB25-19H |           | A | 1-8  | 4 | 4 | VRVRGIGRTPFDY           | 13 | λ | 10-5  | 3 | SAWDSSLSARL   | 11 | - | -     |  |
| LB25-21H |           | A | 3-66 | 3 | 6 | ARGGDVGARFGMDV          | 14 | κ | 1-39  | 1 | QQSYSAPWT     | 9  | - | -     |  |
| LB25-22H | =LB25-15H | A | 4-39 | 5 | 5 | ARVGYSYGRRFDP           | 13 | λ | 1-51  | 2 | EKWDP RVSSVA  | 11 | - | -     |  |
| LB25-23H | =LB25-23H | A | 3-66 | 3 | 6 | ARGGDVGARFGMDV          | 14 | κ | 1-39  | 1 | QQSYSAPWT     | 9  | - | -     |  |
| LB25-24H |           | A | 3-23 | 2 | 3 | AKGPPTTMAFDM            | 12 | λ | 2-11  | 1 | CSYGGQYRFV    | 10 | - | SSA60 |  |
| LB25-25H |           | G | 1-18 | 3 | 4 | AGGRSTYTYFDY            | 12 | κ | 1-12  | 3 | QQANTFPFS     | 9  | - | -     |  |
| LB25-26H | =LB25-7H  | G | 3-30 | 1 | 4 | AREMKQGATGSRFFDF        | 16 | λ | 3-1   | 1 | QAWAFSAAV     | 9  | - | SSA52 |  |
| LB25-30H | =LB25-15H | A | 4-39 | 5 | 5 | ARVGYSYGRRFDP           | 13 | λ | 1-51  | 2 | EKWDP RVSSVA  | 11 | - | -     |  |
| LB25-35H |           | A | 3-66 | 6 | 4 | ATKRQVPYTFDN            | 13 | λ | 2-23  | 2 | CSYSGSFTLEV   | 11 | - | -     |  |
| LB25-36H | =LB25-1H  | G | 3-30 | 1 | 4 | AKDPSRYNWIYADH          | 14 | λ | 3-19  | 3 | NSRDSSNNPSWV  | 12 | - | -     |  |
| LB25-37H |           | G | 3-30 | 6 | 4 | ARDIMATGVTPRYCFDH       | 17 | κ | 3-15  | 4 | QHYTNWPLT     | 9  | - | -     |  |
| LB25-38H |           | A | 3-15 | 6 | 4 | TTWGSAAGKD              | 10 | κ | 1-17  | 2 | LQHYSFPHT     | 9  | - | -     |  |
| LB25-39H |           | A | 3-7  | 2 | 4 | ARDLVEAIGAFDY           | 13 | κ | 3-15  | 1 | QQYNNWPPWT    | 10 | - | -     |  |
| LB25-40H |           | G | 7-4  | 1 | 4 | ARDTWKVIY               | 9  | λ | 1-40  | 3 | QSYDNRHSGWV   | 11 | - | -     |  |
| LB25-43H |           | G | 3-30 | 3 | 1 | ARDAGDDSDRS GPKFVKHFDL  | 21 | κ | 1D-12 | 5 | QQADVFPIS     | 9  | - | SSA60 |  |
| LB25-45H |           | A | 1-8  | 4 | 4 | VRVRGIGRTPFDY           | 13 | λ | 3-1   | 2 | QAWDSQTAF     | 9  | - | -     |  |
| LB25-48H |           | A | 3-21 | 1 | 2 | ARRRERGDWFLDL           | 13 | λ | 1-51  | 2 | GAWDSNLS DGPV | 12 | - | SSA60 |  |
| LB25-49H | =LB25-5H  | M | 3-11 | 2 | 6 | AREACSGATCYRPEVYSNYGMDV | 23 | κ | 3-15  | 1 | QHYNWPPWT     | 10 | - | -     |  |
| LB25-50H |           | A | 1-18 | 1 | 6 | ARDLRRSATGNLYYHGMDV     | 19 | κ | 3-15  | 4 | QQYNNWPQA     | 9  | - | -     |  |
| LB25-51H |           | A | 3-11 | 6 | 3 | ARDAGGGWPGALDV          | 14 | κ | 4-1   | 1 | QQYLGTWT      | 8  | - | -     |  |
| LB25-52H |           | A | 3-23 | 1 | 4 | AKEWAELD                | 9  | κ | 3D-15 | 1 | HQYHNWPRWT    | 10 | - | -     |  |
| LB25-53H |           | A | 3-33 | 6 | 4 | ARDSITSFDY              | 10 | κ | 1-9   | 2 | QLLISYPRT     | 9  | - | SSA60 |  |

|          |          |   |      |   |   |                        |    |   |      |   |               |    |   |        |  |
|----------|----------|---|------|---|---|------------------------|----|---|------|---|---------------|----|---|--------|--|
| LB25-55H | =LB25-1H | G | 3-30 | 1 | 4 | AKDPSRYNWIYADH         | 14 | λ | 3-19 | 3 | NSRDSSNNPSWV  | 12 | - | -      |  |
| LB25-56H |          | A | 1-18 | 3 | 4 | AREAGGLGLPDH           | 13 | κ | 3-20 | 1 | QHYGYSPER     | 9  | - | -      |  |
| LB25-59H |          | A | 3-7  | 3 | 5 | ARPAKHYHDTSGYSNWFD     | 19 | κ | 4-1  | 1 | QQYYTSPPT     | 9  | - | -      |  |
| LB25-60H | =LB25-1H | G | 3-30 | 1 | 4 | AKDPSRYNWIYADH         | 14 | λ | 3-19 | 3 | NSRDSSNNPSWV  | 12 | - | -      |  |
| LB32-2H  |          | A | 7-4  | 3 | 4 | ARGATDDTSGYYFDF        | 16 | κ | 4-1  | 5 | QQYFSTLAIT    | 10 | - | CENP-C |  |
| LB32-3H  |          | A | 3-11 | 2 | 4 | ARGLVYCAGDCYIPEY       | 16 | λ | 1-47 | 2 | ATWDDRVSGHV   | 12 | - | -      |  |
| LB32-4H  |          | A | 3-74 | 6 | 4 | ARGRAAGGDY             | 10 | κ | 2-30 | 1 | MQGTHLWT      | 8  | - | -      |  |
| LB32-5H  |          | A | 5-51 | 3 | 4 | ATYRPYFYGPDDRPAGYFFDN  | 21 | λ | 6-57 | 3 | QSYDRDNLWV    | 10 | - | -      |  |
| LB32-7H  |          | A | 3-23 | 3 | 4 | AKDYDRNEYDFPFDY        | 15 | κ | 2-24 | 1 | MQATQFPRT     | 9  | - | -      |  |
| LB32-8H  |          | A | 4-31 | 5 | 6 | ARDQGDNPTPPYYFYGLDV    | 20 | λ | 1-44 | 3 | SSWDDKLNGRV   | 11 | - | MIS12C |  |
| LB32-9H  |          | A | 3-21 | 5 | 4 | ARDLSGYDYSPFDY         | 14 | κ | 1-5  | 2 | QQCNSYPYT     | 9  | - | MIS12C |  |
| LB32-10H |          | A | 3-11 | 4 | 4 | AREGPRGTVTLKRHPFDS     | 18 | λ | 2-14 | 3 | CSYTFDTTWV    | 10 | - | MIS12C |  |
| LB32-11H |          | A | 3-74 | 2 | 6 | AGARDCGGGSGHQGHYYSGMDV | 22 | κ | 2-28 | 2 | MQGLQPPYT     | 9  | - | -      |  |
| LB32-12H |          | A | 3-73 | 4 | 4 | ARRDGGNSGSLFDN         | 14 | λ | 4-69 | 1 | QTWGKGIV      | 8  | - | -      |  |
| LB32-13H |          | A | 1-8  | 2 | 4 | ARGLYRSCTGGSCYLKY      | 17 | λ | 1-40 | 3 | LSYDSNLDDWV   | 11 | - | -      |  |
| LB32-14H |          | A | 3-9  | 3 | 3 | ARALRGVISGFDV          | 13 | λ | 3-19 | 2 | SCRDSTTNRLRVV | 13 | - | MIS12C |  |
| LB32-15H |          | A | 3-9  | 1 | 6 | AKDMGAVGSQDYFYALDV     | 19 | λ | 3-19 | 2 | NSRDNTGTYLL   | 11 | - | -      |  |
| LB32-16H |          | A | 1-18 | 1 | 4 | ARDSRLGAGSYLDN         | 14 | κ | 1-5  | 2 | QQYKFSY       | 9  | - | -      |  |
| LB32-17H |          | A | 4-59 | 3 | 4 | ASGDFGMGEIEN           | 12 | κ | 3-20 | 4 | QQYGTPLT      | 9  | - | MIS12C |  |
| LB32-19H |          | A | 3-21 | 3 | 5 | ARVLTPLLFGPTDA         | 14 | κ | 3-15 | 5 | QQYSNWLMT     | 9  | - | MIS12C |  |
| LB32-20H |          | A | 1-69 | 5 | 4 | ARGKRYSGYDFDY          | 13 | κ | 1-33 | 2 | QQYDNFPRT     | 9  | - | MIS12C |  |
| LB32-21H |          | A | 3-9  | 3 | 6 | AKDGEQFPYFVLDV         | 15 | λ | 1-44 | 3 | AAWDETLGAGV   | 11 | - | MIS12C |  |

|          |  |   |      |   |   |                       |    |   |       |   |              |    |   |        |  |
|----------|--|---|------|---|---|-----------------------|----|---|-------|---|--------------|----|---|--------|--|
| LB32-22H |  | A | 4-59 | 3 | 4 | ARLDYFGSGITSDF        | 15 | κ | 3-15  | 3 | QQHTYWPRT    | 9  | - | -      |  |
| LB32-23H |  | A | 4-61 | 6 | 3 | VRNARPGIPAAGI         | 13 | λ | 3-25  | 2 | QSVDSGSGSYVV | 11 | - | -      |  |
| LB32-24H |  | A | 5-51 | 4 | 4 | ATLYGDLDF             | 9  | λ | 1-40  | 3 | QSFDSLGAUV   | 11 | - | -      |  |
| LB32-25H |  | A | 3-11 | 1 | 6 | ARDKPGSYSGSYYYGMDV    | 21 | λ | 1-44  | 2 | AACDSLNGHVL  | 12 | - | -      |  |
| LB32-26H |  | A | 3-30 | 4 | 6 | ARDATTATDHGLDV        | 15 | λ | 3-25  | 1 | QSSDNGTYLV   | 11 | - | CENP-C |  |
| LB32-27H |  | A | 4-31 | 4 | 4 | ARDRTGGGFES           | 11 | κ | 1-39  | 2 | HQGYRTPYT    | 9  | - | CENP-C |  |
| LB32-28H |  | A | 3-21 | 5 | 4 | ARDLSGYDYSFPDY        | 14 | κ | 1-NL1 | 1 | HQYNAFPWT    | 9  | - | -      |  |
| LB32-29H |  | A | 3-7  | 4 | 4 | ARLPRQLDY             | 9  | κ | 2-30  | 2 | MQGTHWPYT    | 9  | - | -      |  |
| LB32-30H |  | A | 3-74 | 1 | 6 | ARVKTYYSYGMVDV        | 13 | κ | 3-20  | 1 | QQSGSSRWT    | 9  | - | -      |  |
| LB32-31H |  | A | 3-33 | 1 | 4 | ATVGTTHSFFDW          | 12 | κ | 1-5   | 4 | QHYSYPLS     | 9  | - | -      |  |
| LB32-32H |  | A | 4-59 | 7 | 6 | ARDRPLTGDVYGMVDV      | 15 | κ | 1-NL1 | 1 | QQFHNFPWT    | 9  | - | MIS12C |  |
| LB32-34H |  | A | 3-9  | 2 | 4 | VRDAGWVTAASVY         | 13 | λ | 1-44  | 3 | APWDDSLKGWV  | 11 | - | -      |  |
| LB32-35H |  | A | 5-51 | 5 | 4 | ARRGYSYHPTEDFDL       | 16 | κ | 2-30  | 1 | MQGTHWPLWT   | 10 | - | -      |  |
| LB32-37H |  | A | 5-51 | 5 | 4 | ARRGYSYHPTEDFDL       | 16 | λ | 2-11  | 1 | CSYTGSYNYV   | 10 | - | -      |  |
| LB32-40H |  | A | 5-51 | 6 | 4 | ARFLGASPEKFDY         | 13 | κ | 3-15  | 4 | QQYNDGLT     | 8  | - | -      |  |
| LB32-41H |  | A | 3-64 | 2 | 6 | AREIDCSTATCYSYYYHGLDV | 21 | κ | 2-28  | 2 | MQPLQTLYT    | 9  | - | CENP-C |  |
| LB32-42H |  | A | 4-30 | 3 | 5 | ARGGTHHDILTGHITNWFDV  | 20 | κ | 6-21  | 4 | HQSSYSPLT    | 9  | - | -      |  |
| LB32-43H |  | A | 3-74 | 2 | 1 | GRDLGGFGSV            | 10 | κ | 2-28  | 2 | MQALQTPYT    | 9  | - | -      |  |
| LB32-49H |  | A | 3-23 | 3 | 5 | AREKLWFGFEGDSL        | 14 | κ | 1-33  | 2 | QQYAILPT     | 8  | - | -      |  |
| LB32-50H |  | A | 3-9  | 3 | 6 | ANDRGFQGLLRGMAV       | 15 | λ | 2-23  | 3 | CSYAGRSSWV   | 10 | - | CENP-C |  |
| LB32-51H |  | A | 1-24 | 2 | 4 | TTGPRSCIGDRCHSNDY     | 18 | κ | 1-39  | 4 | QQSYSGLT     | 8  | - | MIS12C |  |

Iso; isotype

Supplementary table S3. Clinical characteristics of the patients used for the lesion antibody panel

| Patients ID               | LB11      | LB02      | LB23      | LB32      | LB01      | LB25      | LB12      | LB24      | LB20      |
|---------------------------|-----------|-----------|-----------|-----------|-----------|-----------|-----------|-----------|-----------|
| Sex                       | Female    | Male      | Female    |
| Age                       | 47        | 51        | 60        | 31        | 19        | 86        | 67        | 36        | 54        |
| Disease                   | sicca     | pSS       | pSS       | pSS       | sicca     | pSS       | pSS       | pSS       | sSS,RA    |
| Disease duration (months) | 10        | 18        | 8         | 168       | 8         | 120       | 12        | 1         | 10        |
| Greenspan grade           | 1         | 3         | 4         | 4         | 1         | 4         | 2         | 4         | 3         |
| Medication                | None      | MTX       |
| Serum antibody            |           |           |           |           |           |           |           |           |           |
| ANA titer                 | <1:40     | <1:40     | <1:40     | 1:640     | >1:2560   | 1:80      | 1:40      | 1:640     | >1:2560   |
| ANA type*                 |           |           |           | h, d, n   | s         | h, s      | s, c      | s         | s         |
| anti-SSA52/60 antibody    | -         | -         | -         | -         | +         | +         | +         | +         | +         |
| anti-SSB antibody         | -         | -         | -         | -         | -         | +         | +         | +         | +         |
| anti-CENP-B antibody      | -         | NA        | -         | +         | -         | -         | -         | -         | -         |
| rheumatoid factor         | -         | NA        | NA        | -         | +         | -         | +         | +         | +         |
| Sorted cell, n            | 32        | 29        | 18        | 48        | 19        | 59        | 32        | 21        | 94        |
| Antibody produced, n (%)  | 30 (93.8) | 24 (82.7) | 16 (88.9) | 39 (81.3) | 16 (84.2) | 37 (62.7) | 21 (65.6) | 19 (90.5) | 54 (57.4) |

MTX; methotrexate, h; homogenous, d; discrete-speckled, n; nucleolar, s; speckled, c; cytosol, NA; not assessed

Supplementary table S4. Anti-SSA/SSB profile of serum and lesion antibody panel

| Patient ID                   | LB11 | LB02 | LB23 | LB32 | LB01   | LB25   | LB12   | LB24   | LB20   |
|------------------------------|------|------|------|------|--------|--------|--------|--------|--------|
| Serum anti-SSA52/60 antibody | -    | -    | -    | -    | +      | +      | +      | +      | +      |
| Serum anti-SSB antibody      | -    | -    | -    | -    | -      | +      | +      | +      | +      |
| Antibody produced, n         | 30   | 29   | 16   | 39   | 16     | 37     | 21     | 19     | 54     |
| Anti-SSA52 antibody, n       | 0    | 0    | 0    | 0    | 1      | 5      | 0      | 1      | 0      |
| Anti-SSA60 antibody, n       | 0    | 0    | 0    | 0    | 6      | 4      | 6      | 3      | 4      |
| Anti-SSB antibody, n         | 0    | 0    | 0    | 0    | 0      | 0      | 2      | 1      | 12     |
| Anti-SSA/SSB antibody, n     | 0    | 0    | 0    | 0    | 7      | 9      | 8      | 5      | 16     |
| (%)                          | (0)  | (0)  | (0)  | (0)  | (43.8) | (24.3) | (38.1) | (26.3) | (29.6) |

Supplementary table S5. ACA profile of serum and lesion antibody panel

| Patient ID                     | LB11 | LB02   | LB23 | LB32   | LB01  | LB25 | LB12 | LB24 | LB20 |
|--------------------------------|------|--------|------|--------|-------|------|------|------|------|
| Serum ANA discrete speckled    | -    | -      | -    | +      | -     | -    | -    | -    | -    |
| Serum anti-CENP-B antibody     | -    | -      | -    | +      | -     | -    | -    | -    | -    |
| Antibody produced, n           | 30   | 29     | 16   | 39     | 16    | 37   | 21   | 19   | 54   |
| Anti-MIS12C antibody, n        | 0    | 1      | 0    | 10     | 0     | 0    | 0    | 0    | 0    |
| Anti-CBX5 antibody, n          | 0    | 1      | 0    | 0      | 1     | 0    | 0    | 0    | 0    |
| Anti-CENP-A antibody, n        | 0    | 1      | 0    | 0      | 0     | 0    | 0    | 0    | 0    |
| Anti-CENP-B antibody, n        | 0    | 0      | 0    | 0      | 0     | 0    | 0    | 0    | 0    |
| Anti-CENP-C antibody, n        | 0    | 5      | 0    | 5      | 0     | 0    | 0    | 0    | 0    |
| Centromere-related antibody, n | 0    | 8      | 0    | 15     | 1     | 0    | 0    | 0    | 0    |
| (%)                            | (0)  | (27.5) | (0)  | (38.5) | (6.3) | (0)  | (0)  | (0)  | (0)  |

## Supplementary figures

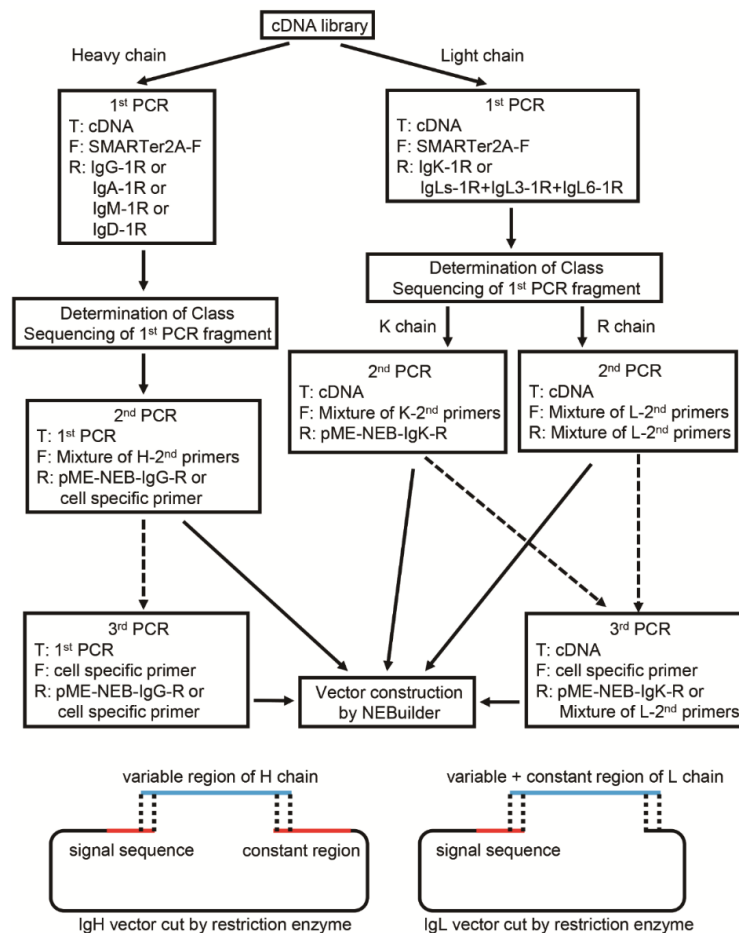

Supplementary figure S1. Cloning strategy of immunoglobulin sequences from a single-cell cDNA library

The variable regions of the immunoglobulin sequences for the heavy chain and light chain were cloned separately. For the heavy chain, PCR was performed from single-cell cDNA using common F primers and an isotype-specific R primer. The resulting band was cut, extracted, and sequenced. A second PCR was performed with the products from the first PCR using a mixture of major F primer and an IgG-specific R primer (for IgG) or a cell-specific R primer (other isotypes). If the band was not obtained by the second PCR, a third PCR was performed using a cell-specific F primer instead of a mixture of major F primers. For the light chain, PCR was performed from single-cell cDNA using common F primers and an isotype-specific R primer. The resulting band was cut, extracted, and sequenced. A second PCR was performed from the cDNA library using a mixture of major F primers and an isotype-specific R primer. A third PCR was performed using a cell-specific F primer and isotype-specific R primer. The obtained bands were cloned into chain-specific plasmids by using NEBuilder HiFi DNA Assembly Master Mix, and their sequences were checked.



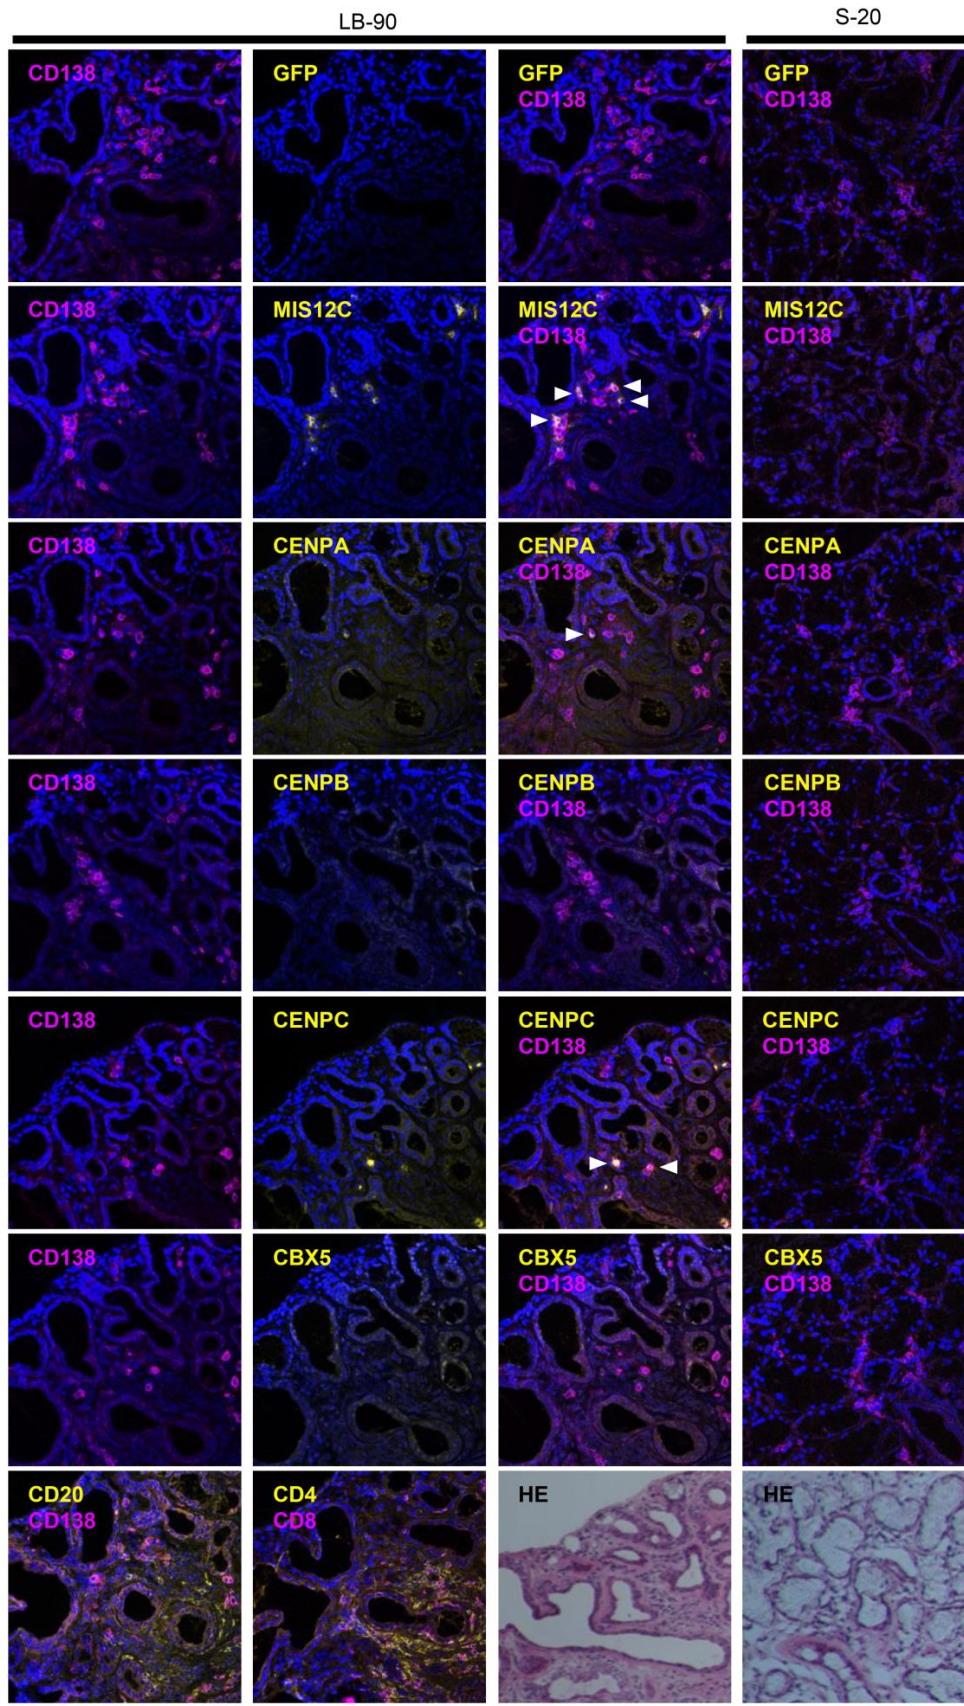

Supplementary figure S2. Identification of ACA-secreting cells in the salivary glands

Fresh-frozen salivary gland sections were stained with purified GFP-autoantigen fusion proteins, antibody against the ASC marker, CD138, CD4, CD8, CD20, and hematoxylin and eosin. Representative images of the salivary glands from a serum ACA-positive patient (LB90) and serum ACA-negative patient (S20) are shown (magnification, 200×). Generally, CD4 and CD20 cells were present at the most crowded part of the lymphocyte infiltration, CD138 cells were present around that area, and CD8 cells were scattered throughout the infiltration. Among them, ACA-secreting cells were present at the margin of infiltrates regardless of size, and this is consistent with the localization of anti-SSA52 antibody secreting cells<sup>16</sup>. White arrowheads indicate ACA-secreting cells existing in the same area of serial section. Scale bar indicates 100 μm.

**Supplementary data**

Supplementary data S1. Mass spectrometry results

This data is provided as excel file. Centromere-related proteins are shown in red.

**Supplementary references**

37. EASL Clinical Practice Guidelines: The diagnosis and management of patients with primary biliary cholangitis. *Journal of hepatology* 2017;67:145-172.
38. Arias-Palomo E, Yamashita A, Fernandez I S, *et al*. The nonsense-mediated mRNA decay SMG-1 kinase is regulated by large-scale conformational changes controlled by SMG-8. *Genes & development* 2011;25:153-164.
39. Schulte-Pelkum J, Fritzler M & Mahler M. Latest update on the Ro/SS-A autoantibody system. *Autoimmun Rev* 2009;8:632-637.
